# Supplementary material for: A new look at the environmental conditions favorable to secondary ice production
Source: Copernicus journal article supplement (doi:10.5194/acp-2019-611), 2019-07-26
Supplement: Supplementary file [file acp-2019-611-AC2-supplement.pdf]

**Replies to Reviewer 2 “A new look at the environmental conditions favorable to secondary ice production” by Alexei Korolev et al.**

*This paper summarizes observations from two field projects where the Convair-580 sampled mixed phase clouds from a tropical MCS and from a frontal cloud. This paper is an excellent contribution to the scientific literature. I find that the most important conclusion of this study is to emphasize how we sorely need laboratory studies to have any sort of robust quantification of the relative frequency of SIP mechanisms, and the authors have done a good job in placing the context the two studies they did with the past work that has been done.*

**Replies**

Authors appreciate the Reviewer’s comments and positive assessment of the result of our study.
